# Supplementary material
Source: PubMed Central journal article supplement (PMC9413397)
Supplement: NIHMS1786854-supplement-SI.pdf [file NIHMS1786854-supplement-SI.pdf]

# SUPPORTING INFORMATION

## ***Lipid Coverage in Nanospray Desorption Electrospray Ionization Mass Spectrometry Imaging (nano-DESI MSI) of Mouse Lung Tissues***

Son N. Nguyen<sup>1,5</sup>, Jennifer E. Kyle<sup>2</sup>, Sydney E. Dautel<sup>2</sup>, Ryan Sontag<sup>2</sup>, Teresa Luders<sup>2</sup>, Richard Corley<sup>2</sup>, Charles Ansong<sup>2</sup>, James Carson<sup>3</sup>, and Julia Laskin<sup>1,4</sup>✉

1. *Physical Sciences Division, Pacific Northwest National Laboratory, Richland, WA, USA*
2. *Biological Sciences Division, Pacific Northwest National Laboratory, Richland, WA, USA*
3. *Texas Advanced Computing Center, University of Texas at Austin, Austin, TX 78758, USA*
4. *Department of Chemistry, Purdue University, West Lafayette, IN 47907, USA*
5. *Faculty of Chemistry, VNU-University of Science, Hanoi, Vietnam*

---

✉ address correspondence to:

Julia Laskin  
Department of Chemistry, Purdue University  
560 Oval Drive  
West Lafayette, IN 47907-2084  
jlaskin@purdue.edu

## Table of contents

|                                                                                                                      |        |
|----------------------------------------------------------------------------------------------------------------------|--------|
| <b>Figure S1.</b> A sample Nano-DESI mass spectrum of mouse lung in positive mode.....                               | S3     |
| <b>Figure S2.</b> A sample Nano-DESI mass spectrum of mouse lung in negative mode .....                              | S3     |
| <b>Table S1.</b> Internal standards used in the experiments and their concentration in the extraction solvents ..... | S4     |
| <b>Table S2.</b> Lipid and metabolite signals observed by Nano-DESI MS.....                                          | S5-S21 |

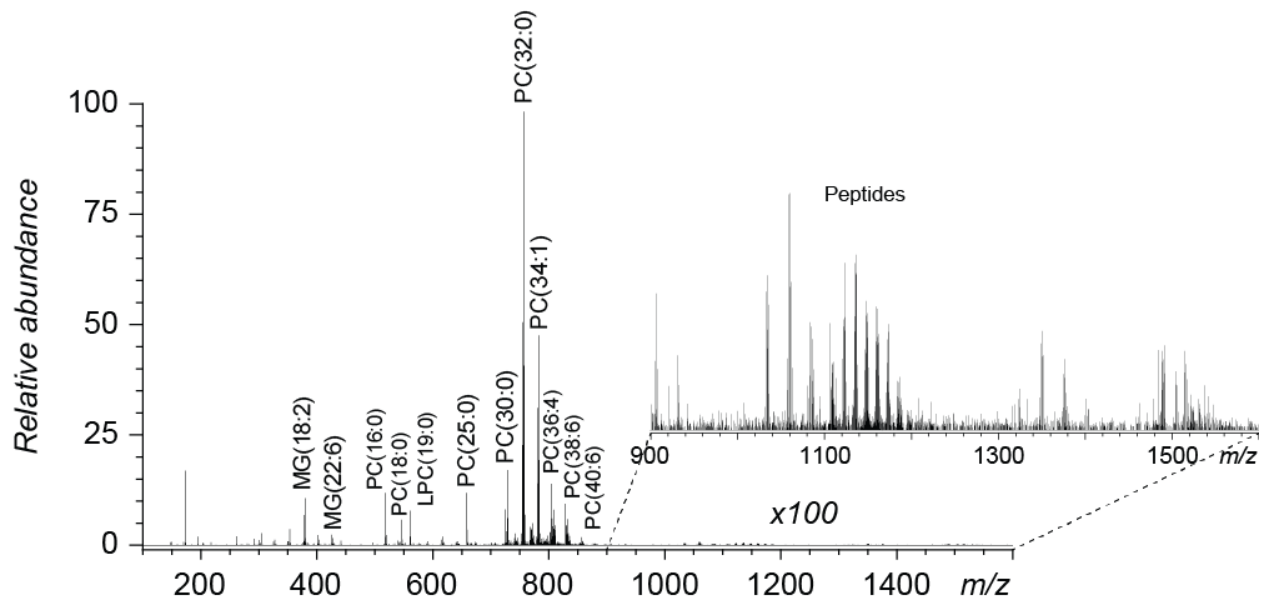

**Figure S1.** A sample Nano-DESI mass spectrum of mouse lung in positive mode

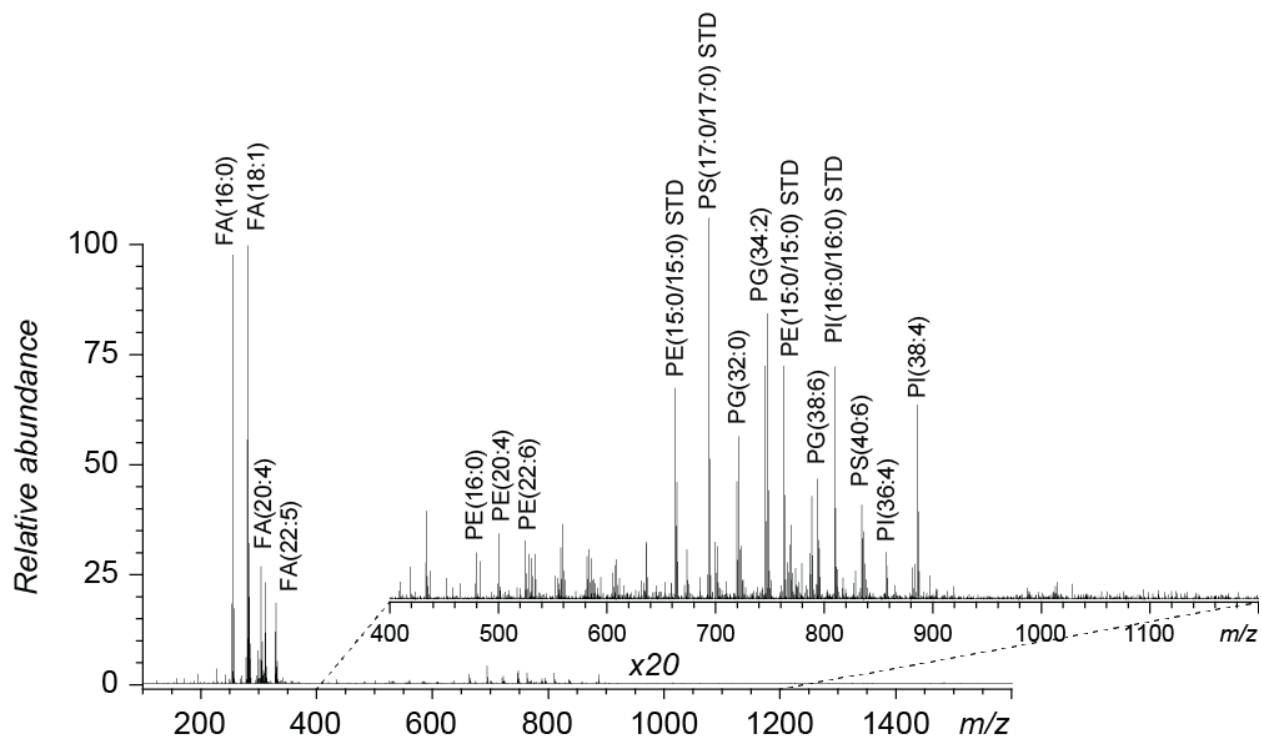

**Figure S2.** A sample Nano-DESI mass spectrum of mouse lung in negative mode

**Table S1.** Internal standards used in the experiments and their concentration in the extraction solvents

| <b>Ionization technique</b> | <b>Standard</b>          | <b>Exact m/z</b> | <b>Adduct</b>       | <b>Concentration (uL)</b> |
|-----------------------------|--------------------------|------------------|---------------------|---------------------------|
| <b>Positive mode</b>        | Acetylcholine-1,1,2,2-d4 | 150.1432         | [M] <sup>+</sup>    | 10                        |
|                             | LPC 19:0                 | 560.3688         | [M+Na] <sup>+</sup> | 0.5                       |
|                             | PC(12:0/13:0)            | 658.4428         | [M+Na] <sup>+</sup> | 1                         |
| <b>Negative mode</b>        | Oleic Acid-d17           | 298.3548         | [M-H] <sup>-</sup>  | 5                         |
|                             | Arachidonic Acid-d8      | 311.2826         | [M-H] <sup>-</sup>  | 1                         |
|                             | PE(15:0/15:0)            | 662.4762         | [M-H] <sup>-</sup>  | 1                         |
|                             | PS(17:0/17:0)            | 693.4702         | [M-H] <sup>-</sup>  | 1                         |
|                             | PG(15:0/15:0)            | 762.5282         | [M-H] <sup>-</sup>  | 0.2                       |
|                             | PI(16:0/16:0)            | 809.5177         | [M-H] <sup>-</sup>  | 0.4                       |

Table S2. Lipid and metabolite signals observed by Nano-DESI MS

| Unique peaks | Ion images                                                                          | m/z      | Name | Number identified | Name common        | adduct  | Unique peaks | Ion images                                                                            | m/z      | Name     | Number identified | Name common                                    | adduct  |
|--------------|-------------------------------------------------------------------------------------|----------|------|-------------------|--------------------|---------|--------------|---------------------------------------------------------------------------------------|----------|----------|-------------------|------------------------------------------------|---------|
| 1            | 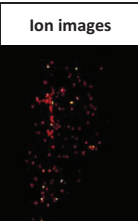    | 146.0452 | MB   | 1                 | Glutamate          | [M-H]-  | 9            |     | 255.1606 | MB       | 9                 | 5-Nonyltetrahydro-2-oxo-3-furancarboxylic acid | [M-H]-  |
| 2            |    | 148.0044 | MB   | 2                 | Taurine            | [M+Na]+ | 10           |    | 255.2317 | FA(16:0) | 10                | palmitic acid                                  | [M-H]-  |
| 3            |    | 159.0283 | MB   | 3                 | Hypoxanthine       | [M+Na]+ | 11           |    | 267.0723 | FA       | 11                | 3-Deoxy-D-glycero-D-galacto-2-nonulosonic acid | [M-H]-  |
| 4            |    | 175.0240 | MB   | 4                 | L-Ascorbic acid    | [M-H]-  | 12           |    | 275.2003 | FA(18:4) | 12                | Stearidonic acid                               | [M-H]-  |
| 5            |   | 203.0532 | MB   | 5                 | Glucose            | [M+Na]+ | 13           |   | 277.2161 | FA(18:3) | 13                | calendic acid                                  | [M-H]-  |
| 6            |  | 204.0312 | MB   | 6                 | Xanthurenic acid   | [M-H]-  | 14           |  | 279.2317 | FA(18:2) | 14                | otadecadienoic acid                            | [M-H]-  |
| 7            |  | 215.0318 | MB   | 7                 | D-Glucose          | [M-H]-  | 15           |  | 280.0928 | MB       | 15                | sn-glycero-3-Phosphocholine                    | [M+Na]+ |
| 8            |  | 237.2212 | FA   | 8                 | cis-11-Hexadecenal | [M-H]-  | 16           |  | 281.2472 | FA(18:1) | 16                | oleic acid                                     | [M-H]-  |

| Unique peaks | Ion images                                                                          | m/z      | Name     | Number identified | Name common           | adduct  |
|--------------|-------------------------------------------------------------------------------------|----------|----------|-------------------|-----------------------|---------|
| 17           | 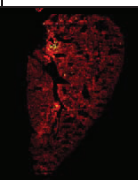   | 291.0706 | MB       | 17                | Inosine               | [M+Na]+ |
| 18           |    | 295.2265 | FA       | 18                | Dimorphecolic acid    | [M-H]-  |
| 19           |    | 297.2422 | FA       | 19                | Ricinoleic acid       | [M-H]-  |
| 20           |    | 301.2158 | FA(20:5) | 20                | eicosapentaenoic acid | [M-H]-  |
| 21           |   | 303.2316 | FA(20:4) | 21                | Arachidonic acid      | [M-H]-  |
| 22           |  | 305.2473 | FA(20:3) | 22                | eicosatrienoic acid   | [M-H]-  |
| 23           |  | 307.2629 | FA(20:2) | 23                | FA(20:2)              | [M-H]-  |
| 24           |  | 309.2784 | FA(20:1) | 24                | eicosenoic acid       | [M-H]-  |

| Unique peaks | Ion images                                                                            | m/z      | Name     | Number identified | Name common                | adduct |
|--------------|---------------------------------------------------------------------------------------|----------|----------|-------------------|----------------------------|--------|
| 25           | 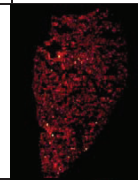   | 315.1951 | FA       | 25                | preclavulone lactone       | [M-H]- |
| 26           |    | 317.2107 | FA       | 26                | 8(9)-EpETE                 | [M-H]- |
| 27           |    | 327.2315 | FA(22:6) | 27                | docosahexaenoic acid (DHA) | [M-H]- |
| 28           |    | 329.2471 | FA(22:5) | 28                | docosapentaenoic acid      | [M-H]- |
| 29           |   | 333.2785 | FA(22:3) | 29                | FA(22:3)                   | [M-H]- |
| 30           |  | 335.2215 | FA       | 30                | 15-epi-PGA1                | [M-H]- |
| 31           |  | 335.2940 | FA(22:2) | 31                | FA(22:2)                   | [M-H]- |
| 32           |  | 337.3097 | FA(22:1) | 32                | FA(22:1)                   | [M-H]- |

| Unique peaks | Ion images                                                                          | m/z      | Name     | Number identified | Name common                          | adduct  |
|--------------|-------------------------------------------------------------------------------------|----------|----------|-------------------|--------------------------------------|---------|
| 33           | 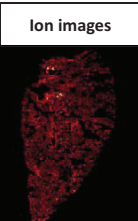    | 346.0545 | MB       | 33                | Adenosine monophosphate              | [M-H]-  |
| 34           |    | 351.2516 | MG(16:1) | 34                | MG 16:1                              | [M+Na]+ |
| 35           |    | 353.2674 | MG(16:0) | 35                | MG 16:0                              | [M+Na]+ |
| 36           |    | 355.2628 | FA(24:6) | 36                | tetracosahexaenoic acid (THA)        | [M-H]-  |
| 37           |   | 357.2782 | ST       | 37                | 5 $\beta$ -Chol-9(11)-en-24-oic Acid | [M-H]-  |
| 38           |  | 359.2939 | FA(24:4) | 38                | tetracosatetraenoic acid             | [M-H]-  |
| 39           |  | 361.1900 | MB       | 39                | Lys Ile Cys                          | [M-H]-  |
| 40           |  | 365.3407 | FA(24:1) | 40                | Tetracosenoic acid                   | [M-H]-  |

| Unique peaks | Ion images                                                                            | m/z      | Name     | Number identified | Name common        | adduct  |
|--------------|---------------------------------------------------------------------------------------|----------|----------|-------------------|--------------------|---------|
| 41           | 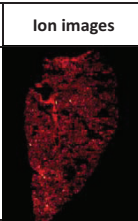    | 369.2268 | MB       | 41                | Val Arg Pro        | [M-H]-  |
| 42           |    | 377.2674 | MG(18:2) | 42                | MG 18:2            | [M+Na]+ |
| 43           |    | 379.2831 | MG(18:1) | 43                | MG 18:1            | [M+Na]+ |
| 44           |    | 381.2986 | MG(18:0) | 44                | MG 18:0            | [M+Na]+ |
| 45           |   | 400.3436 | FA       | 45                | Palmitoylcarnitine | [M+H]+  |
| 46           |  | 401.2675 | MG(20:4) | 46                | MG 20:4            | [M+Na]+ |
| 47           |  | 409.3454 | FA       | 47                | Tetracosanediol    | [M+K]+  |
| 48           |  | 425.2676 | MG(22:6) | 48                | MG 22:6            | [M+Na]+ |

| Unique peaks | Ion images                                                                          | m/z      | Name       | Number identified | Name common                      | adduct                                   |
|--------------|-------------------------------------------------------------------------------------|----------|------------|-------------------|----------------------------------|------------------------------------------|
| 49           | 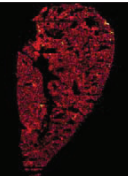   | 427.2679 | FA         | 49                | 2-glycerol-PGD2                  | [M+H] <sup>+</sup>                       |
| 50           |    | 427.2833 | MG(22:5)   | 50                | MG 22:5                          | [M+Na] <sup>+</sup>                      |
| 51           |    | 429.2990 | MG(22:4)   | 51                | MG 22:4                          | [M+Na] <sup>+</sup>                      |
| 52           |    | 436.2835 | PE(P-16:0) | 52                | PE(P-16:0/0:0)                   | [M-H] <sup>-</sup>                       |
| 53           |   | 449.3617 | FA         | 53                | Hexacosanedioic acid             | [M+Na] <sup>+</sup>                      |
| 54           |  | 452.2780 | PE(16:0)   | 54<br>55          | PE(16:0/0:0)_A<br>PE(16:0/0:0)_B | [M-H] <sup>-</sup><br>[M-H] <sup>-</sup> |
| 55           |  | 476.2764 | PC(13:0)   | 56                | PC(13:0/0:0)                     | [M+Na] <sup>+</sup>                      |
| 56           |  | 478.2937 | PE(18:1)   | 57<br>58          | PE(18:1/0:0)_A<br>PE(18:1/0:0)_B | [M-H] <sup>-</sup><br>[M-H] <sup>-</sup> |

| Unique peaks | Ion images                                                                            | m/z                  | Name                 | Number identified | Name common                      | adduct                                    |
|--------------|---------------------------------------------------------------------------------------|----------------------|----------------------|-------------------|----------------------------------|-------------------------------------------|
| 57           |    | 480.3094             | PE(18:0)             | 59                | PE(18:0/0:0)                     | [M-H] <sup>-</sup>                        |
| 58           |    | 483.2735             | PG(16:0)             | 60<br>61          | PG(16:0/0:0)_A<br>PG(16:0/0:0)_B | [M-H] <sup>-</sup><br>[M-H] <sup>-</sup>  |
| 59           |    | 490.2910<br>490.2934 | PC(14:0)<br>PC(16:3) | 62<br>63          | PC(0:0/14:0)<br>PC(16:3/0:0)     | [M+Na] <sup>+</sup><br>[M+H] <sup>+</sup> |
| 60           |    | 500.2791             | PE(20:4)             | 64                | PE(20:4/0:0)                     | [M-H] <sup>-</sup>                        |
| 61           |   | 504.3067             | PC(15:0)             | 65                | PC(15:0/0:0)                     | [M+Na] <sup>+</sup>                       |
| 62           |  | 508.3386             | PE(20:0)             | 66                | PE(20:0)                         | [M-H] <sup>-</sup>                        |
| 63           |  | 509.2882             | PG(18:1)             | 67<br>68          | PG(18:1/0:0)_A<br>PG(18:1/0:0)_B | [M-H] <sup>-</sup><br>[M-H] <sup>-</sup>  |
| 64           |  | 511.3044             | PG(18:0)             | 69<br>70          | PG(18:0/0:0)_A<br>PG(18:0/0:0)_B | [M-H] <sup>-</sup><br>[M-H] <sup>-</sup>  |



| Unique peaks | Ion images                                                                          | m/z      | Name      | Number identified | Name common       | adduct              |
|--------------|-------------------------------------------------------------------------------------|----------|-----------|-------------------|-------------------|---------------------|
| 65           | 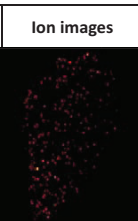    | 516.3067 | PC(16:1)  | 71                | PC(16:1/0:0)      | [M+Na] <sup>+</sup> |
| 66           |    | 518.3223 | PC(16:0)  | 72                | PC(0:0/16:0)      | [M+Na] <sup>+</sup> |
| 67           |    | 524.2988 | PS(18:0)  | 73                | PS(18:0/0:0)      | [M-H] <sup>-</sup>  |
| 68           |    | 528.3095 | PE(22:4)  | 74                | PE(22:4/0:0)      | [M-H] <sup>-</sup>  |
| 69           |    | 529.2584 | PG(20:5)  | 75                | PG(20:5/0:0)      | [M-H] <sup>-</sup>  |
| 70           |   | 535.4363 | DG(30:3)  | 76                | DG(12:0/18:3/0:0) | [M+H] <sup>+</sup>  |
| 71           |  | 536.5042 | Cer(34:1) | 77                | Cer(d18:1/16:0)   | [M-H] <sup>-</sup>  |
| 72           |  | 540.3067 | PC(18:3)  | 78                | PC(18:3/0:0)      | [M+Na] <sup>+</sup> |

| Unique peaks | Ion images                                                                            | m/z      | Name     | Number identified | Name common         | adduct              |
|--------------|---------------------------------------------------------------------------------------|----------|----------|-------------------|---------------------|---------------------|
| 73           | 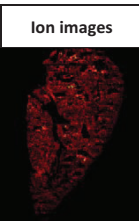    | 542.3223 | PC(18:2) | 79                | PC(18:2/0:0)        | [M+Na] <sup>+</sup> |
|              |                                                                                       | 542.3243 | PC(20:5) | 80                | PC(20:5/0:0)        | [M+H] <sup>+</sup>  |
| 74           |    | 544.3377 | PC(18:1) | 81                | PC(0:0/18:1)        | [M+Na] <sup>+</sup> |
| 75           |    | 546.3536 | PC(18:0) | 82                | PC(0:0/18:0)        | [M+Na] <sup>+</sup> |
| 76           |    | 548.2755 | PE(22:6) | 83                | PE(22:6/0:0)        | [M+Na] <sup>+</sup> |
| 77           |    | 548.3716 | PC(20:2) | 84                | PC(20:2/0:0)        | [M+H] <sup>+</sup>  |
| 78           |   | 555.2734 | PG(22:6) | 85                | PG(22:6/0:0)_A      | [M-H] <sup>-</sup>  |
|              |                                                                                       |          |          | 86                | PG(22:6/0:0)_B      | [M-H] <sup>-</sup>  |
| 79           |  | 556.3015 | MB       | 87                | Pro Val Glu Thr Leu | [M-H] <sup>-</sup>  |
| 80           |  | 563.4652 | DG(30:0) | 88                | DG(14:0/16:0/0:0)   | [M+Na] <sup>+</sup> |

| Unique peaks | Ion images                                                                          | m/z      | Name     | Number identified | Name common                            | adduct                                     |
|--------------|-------------------------------------------------------------------------------------|----------|----------|-------------------|----------------------------------------|--------------------------------------------|
| 81           | 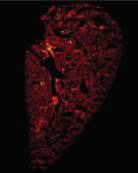   | 566.3223 | PC(20:4) | 89                | PC(0:0/20:4)                           | [M+Na] <sup>+</sup>                        |
| 82           |    | 568.3380 | PC(20:3) | 90                | PC(20:3/0:0)                           | [M+Na] <sup>+</sup>                        |
| 83           |    | 571.2891 | PI(16:0) | 91<br>92          | PI(16:0/0:0)_A<br>PI(16:0/0:0)_B       | [M-H] <sup>-</sup><br>[M-H] <sup>-</sup>   |
| 84           |    | 587.4652 | DG(32:2) | 93                | DG(14:0/18:2/0:0)                      | [M+Na] <sup>+</sup>                        |
| 85           |    | 589.4809 | DG(32:1) | 94<br>95          | DG(14:0/18:1/0:0)<br>DG(16:0/16:1/0:0) | [M+Na] <sup>+</sup><br>[M+Na] <sup>+</sup> |
|              |                                                                                     | 589.4832 | DG(34:4) | 96                | DG(14:0/20:4/0:0)                      | [M+H] <sup>+</sup>                         |
| 86           |   | 590.3223 | PC(22:6) | 97                | PC(22:6/0:0)                           | [M+Na] <sup>+</sup>                        |
| 87           |  | 591.4965 | DG(32:0) | 98                | DG(16:0/0:0/16:0)                      | [M+Na] <sup>+</sup>                        |
| 88           |  | 599.3199 | PI(18:0) | 99<br>100         | PI(18:0/0:0)_B<br>PI(18:0/0:0)_A       | [M-H] <sup>-</sup><br>[M-H] <sup>-</sup>   |

| Unique peaks | Ion images                                                                            | m/z      | Name     | Number identified        | Name common                                                                      | adduct                                                                                   |
|--------------|---------------------------------------------------------------------------------------|----------|----------|--------------------------|----------------------------------------------------------------------------------|------------------------------------------------------------------------------------------|
| 89           | 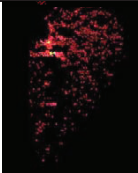   | 613.4809 | DG(34:3) | 101<br>102               | DG(16:0/18:3/0:0)<br>DG(16:1/18:2/0:0)                                           | [M+Na] <sup>+</sup><br>[M+Na] <sup>+</sup>                                               |
| 90           |    | 615.4965 | DG(34:2) | 103                      | DG(16:0/18:2/0:0)                                                                | [M+Na] <sup>+</sup>                                                                      |
| 91           |    | 617.5122 | DG(34:1) | 104                      | DG(16:0/18:1/0:0)                                                                | [M+Na] <sup>+</sup>                                                                      |
| 92           |    | 619.2893 | PI(20:4) | 105<br>106               | PI(20:4/0:0)_A<br>PI(20:4/0:0)_B                                                 | [M-H] <sup>-</sup><br>[M-H] <sup>-</sup>                                                 |
| 93           |    | 619.5278 | DG(34:0) | 107                      | DG(16:0/18:0/0:0)                                                                | [M+Na] <sup>+</sup>                                                                      |
| 94           |   | 635.4652 | DG(36:6) | 108                      | DG(14:0/22:6/0:0)                                                                | [M+Na] <sup>+</sup>                                                                      |
| 95           |  | 637.4809 | DG(36:5) | 109<br>110               | DG(16:0/20:5/0:0)<br>DG(18:2/18:3/0:0)                                           | [M+Na] <sup>+</sup><br>[M+Na] <sup>+</sup>                                               |
| 96           |  | 639.4965 | DG(36:4) | 111<br>112<br>113<br>114 | DG(14:0/22:4/0:0)<br>DG(16:0/20:4/0:0)<br>DG(18:1/18:3/0:0)<br>DG(18:2/0:0/18:2) | [M+Na] <sup>+</sup><br>[M+Na] <sup>+</sup><br>[M+Na] <sup>+</sup><br>[M+Na] <sup>+</sup> |

| Unique peaks | Ion images                                                                          | m/z      | Name      | Number identified | Name common                                                 | adduct                                                            |
|--------------|-------------------------------------------------------------------------------------|----------|-----------|-------------------|-------------------------------------------------------------|-------------------------------------------------------------------|
| 97           |    | 641.5122 | DG(36:3)  | 115<br>116        | DG(16:0/20:3/0:0)<br>DG(18:1/18:2/0:0)                      | [M+Na] <sup>+</sup><br>[M+Na] <sup>+</sup>                        |
| 98           |    | 643.5278 | DG(36:2)  | 117               | DG(18:1/0:0/18:1)                                           | [M+Na] <sup>+</sup>                                               |
| 99           |    | 645.4861 | DG(35:2)  | 118<br>119<br>120 | DG(15:0/20:2/0:0)<br>DG(17:0/18:2/0:0)<br>DG(17:1/18:1/0:0) | [M+K] <sup>+</sup><br>[M+K] <sup>+</sup><br>[M+K] <sup>+</sup>    |
| 100          |    | 645.5435 | DG(36:1)  | 121<br>122        | DG(16:0/20:1/0:0)<br>DG(18:0/18:1/0:0)                      | [M+Na] <sup>+</sup><br>[M+Na] <sup>+</sup>                        |
| 101          |   | 647.5017 | DG(35:1)  | 123<br>124        | DG(17:0/18:1/0:0)<br>DG(19:1/16:0/0:0)                      | [M+K] <sup>+</sup><br>[M+K] <sup>+</sup>                          |
| 102          |  | 648.6294 | Cer(42:1) | 125               | Cer(d18:1/24:0)                                             |                                                                   |
| 103          |  | 661.4809 | DG(38:7)  | 126               | DG(16:1/22:6/0:0)                                           | [M+Na] <sup>+</sup>                                               |
| 104          |  | 663.4965 | DG(38:6)  | 127<br>128<br>129 | DG(16:0/22:6/0:0)<br>DG(16:1/22:5/0:0)<br>DG(18:2/20:4/0:0) | [M+Na] <sup>+</sup><br>[M+Na] <sup>+</sup><br>[M+Na] <sup>+</sup> |

| Unique peaks | Ion images                                                                            | m/z      | Name         | Number identified | Name common                                                 | adduct                                                            |
|--------------|---------------------------------------------------------------------------------------|----------|--------------|-------------------|-------------------------------------------------------------|-------------------------------------------------------------------|
| 105          | 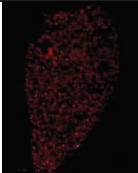   | 665.4397 | PG(28:0)     | 130<br>131        | PG(12:0/16:0)<br>PG(14:0/14:0)                              | [M-H] <sup>-</sup><br>[M-H] <sup>-</sup>                          |
| 106          |    | 665.5122 | DG(38:5)     | 132<br>133<br>134 | DG(16:0/22:5/0:0)<br>DG(18:0/20:5/0:0)<br>DG(18:1/20:4/0:0) | [M+Na] <sup>+</sup><br>[M+Na] <sup>+</sup><br>[M+Na] <sup>+</sup> |
| 107          |    | 667.5278 | DG(38:4)     | 135<br>136<br>137 | DG(16:0/22:4/0:0)<br>DG(18:0/20:4/0:0)<br>DG(18:2/20:2/0:0) | [M+Na] <sup>+</sup><br>[M+Na] <sup>+</sup><br>[M+Na] <sup>+</sup> |
| 108          |    | 669.5435 | DG(38:3)     | 138               | DG(18:0/20:3/0:0)                                           | [M+Na] <sup>+</sup>                                               |
| 109          |   | 670.6115 | Cer(42:2)    | 139               | Cer(d18:1/24:1)                                             | [M+Na] <sup>+</sup>                                               |
| 110          |  | 671.4624 | PA(34:2)     | 140               | PA(34:2)                                                    | [M-H] <sup>-</sup>                                                |
| 111          |  | 672.4217 | PC(25:0-CHO) | 141               | PC(16:0/9:0(CHO))                                           | [M+Na] <sup>+</sup>                                               |
| 112          |  | 673.4782 | PA(34:1)     | 142               | PA(34:1)                                                    | [M-H] <sup>-</sup>                                                |

| Unique peaks | Ion images | m/z                  | Name                 | Number identified | Name common                                                 | adduct                       |
|--------------|------------|----------------------|----------------------|-------------------|-------------------------------------------------------------|------------------------------|
| 113          |            | 675.5305             | PA(O-35:0)           | 143               | PA(O-35:0)                                                  | [M-H]-                       |
| 114          |            | 679.5278             | DG(39:5)             | 144<br>145        | DG(17:0/22:5/0:0)<br>DG(19:1/20:4/0:0)                      | [M+Na]+<br>[M+Na]+           |
| 115          |            | 687.4965             | DG(40:8)             | 146               | DG(18:2/22:6/0:0)                                           | [M+Na]+                      |
| 116          |            | 687.5430             | SM(d16:1/17:0)       | 147               | SM(d16:1/17:0)                                              | [M-H]-                       |
| 117          |            | 689.5122             | DG(40:7)             | 148<br>149        | DG(18:1/22:6/0:0)<br>DG(18:2/22:5/0:0)                      | [M+Na]+<br>[M+Na]+           |
| 118          |            | 690.5080<br>690.5081 | PE(32:0)<br>PE(32:0) | 150<br>151        | PE(16:0/16:0)_A<br>PE(16:0/16:0)_B                          | [M-H]-<br>[M-H]-             |
| 119          |            | 691.5278<br>691.5302 | DG(40:6)<br>DG(42:9) | 152<br>153<br>154 | DG(18:1/22:5/0:0)<br>DG(18:2/22:4/0:0)<br>DG(20:3/22:6/0:0) | [M+Na]+<br>[M+Na]+<br>[M+H]+ |
| 120          |            | 693.5435<br>693.5458 | DG(40:5)<br>DG(42:8) | 155<br>156<br>157 | DG(18:0/22:5/0:0)<br>DG(20:2/22:6/0:0)<br>DG(20:3/22:5/0:0) | [M+Na]+<br>[M+H]+<br>[M+H]+  |

| Unique peaks | Ion images | m/z      | Name       | Number identified | Name common                      | adduct             |
|--------------|------------|----------|------------|-------------------|----------------------------------|--------------------|
| 121          |            | 697.5174 | DG(39:4)   | 158               | DG(19:0/20:4/0:0)                | [M+K]+             |
| 122          |            | 697.5261 | SM(32:1)   | 159<br>160        | SM(d16:1/16:0)<br>SM(d18:1/14:0) | [M+Na]+<br>[M+Na]+ |
| 123          |            | 699.4944 | PA(36:2)   | 161               | PA(36:2)                         | [M-H]-             |
| 124          |            | 700.4553 | PR         | 162               | adenosylhopane                   | [M+K]+             |
| 125          |            | 700.4894 | PC(28:0)   | 163               | PC(14:0/14:0)                    | [M+Na]+            |
| 126          |            | 700.4917 | PC(30:3)   | 164               | PC(16:3/14:0)                    | [M+H]+             |
| 127          |            | 700.4927 | PE(33:2)   | 165               | PE(15:0/18:2)                    | [M-H]-             |
| 128          |            | 700.5277 | PE(P-34:1) | 166               | PE(P-16:0/18:1)                  | [M-H]-             |

| Unique peaks | Ion images | m/z      | Name      | Number identified        | Name common                                                                      | adduct                               |
|--------------|------------|----------|-----------|--------------------------|----------------------------------------------------------------------------------|--------------------------------------|
| 129          |            | 701.5100 | PA(36:1)  | 167                      | PA(36:1)                                                                         | [M-H]-                               |
| 130          |            | 704.5959 | Cer(42:1) | 168                      | Cer(d18:1/24:0(2OH))                                                             | [M+K]+                               |
| 131          |            | 713.5487 | DG(40:3)  | 169<br>170<br>171<br>172 | DG(18:1/22:2/0:0)<br>DG(18:2/22:1/0:0)<br>DG(20:0/20:3/0:0)<br>DG(20:1/20:2/0:0) | [M+K]+<br>[M+K]+<br>[M+K]+<br>[M+K]+ |
| 132          |            | 714.5050 | PC(29:0)  | 173                      | PC(14:0/15:0)                                                                    | [M+Na]+                              |
| 133          |            | 714.5089 | PE(34:2)  | 174<br>175               | PE(16:0/18:2)<br>PE(16:1/18:1)                                                   | [M-H]-<br>[M-H]-                     |
| 134          |            | 715.5644 | DG(40:2)  | 176<br>177               | DG(18:1/22:1/0:0)<br>DG(20:0/20:2/0:0)                                           | [M+K]+<br>[M+K]+                     |
| 135          |            | 716.5235 | PE(34:1)  | 178<br>179               | PE(16:1/18:0)<br>PE(16:0/18:1)                                                   | [M-H]-<br>[M-H]-                     |
| 136          |            | 718.5393 | PE(34:0)  | 180                      | PE(16:0/18:0)                                                                    | [M-H]-                               |

| Unique peaks | Ion images | m/z      | Name       | Number identified        | Name common                                                            | adduct                               |
|--------------|------------|----------|------------|--------------------------|------------------------------------------------------------------------|--------------------------------------|
| 137          |            | 719.4863 | PG(32:1)   | 181<br>182<br>183<br>184 | PG(14:0/18:1)<br>PG(16:0/16:1)_A<br>PG(16:0/16:1)_C<br>PG(16:0/16:1)_B | [M-H]-<br>[M-H]-<br>[M-H]-<br>[M-H]- |
| 138          |            | 720.4975 | PE(P-36:5) | 185                      | PE(P-16:0/20:5)                                                        | [M-H]-                               |
| 139          |            | 721.5034 | PG(32:0)   | 186                      | PG(16:0/16:0)                                                          | [M-H]-                               |
| 140          |            | 722.5124 | PE(P-36:4) | 187                      | PE(P-16:0/20:4)                                                        | [M-H]-                               |
| 141          |            | 723.4943 | PA(38:4)   | 188                      | PA(38:4)                                                               | [M-H]-                               |
| 142          |            | 723.5418 | SM(34:2)   | 189                      | SM(d18:2/16:0)                                                         | [M+Na]+                              |
| 143          |            | 725.5101 | PA(38:3)   | 190                      | PA(38:3)                                                               | [M-H]-                               |
| 144          |            | 725.5574 | SM(34:1)   | 191                      | SM(d18:1/16:0)                                                         | [M+Na]+                              |

| Unique peaks | Ion images | m/z      | Name     | Number identified | Name common   | adduct  |
|--------------|------------|----------|----------|-------------------|---------------|---------|
| 145          |            | 726.5050 | PC(30:1) | 192               | PC(14:0/16:1) | [M+Na]+ |
|              |            | 726.5074 | PC(32:4) | 193               | PC(12:0/20:4) | [M+H]+  |
|              |            |          |          | 194               | PC(16:0/16:4) | [M+H]+  |
|              |            |          |          | 195               | PC(16:3/16:1) | [M+H]+  |
| 146          |            | 727.5249 | PA(38:2) | 196               | PA(38:2)      | [M-H]-  |
| 147          |            | 728.5207 | PC(30:0) | 197               | PC(14:0/16:0) | [M+Na]+ |
|              |            | 728.5230 | PC(32:3) | 198               | PC(14:0/18:3) | [M+H]+  |
|              |            |          |          | 199               | PC(16:3/16:0) | [M+H]+  |
| 148          |            | 732.4810 | PS(32:1) | 200               | PS(16:0/16:1) | [M-H]-  |
| 149          |            | 735.5173 | PG(33:0) | 201               | PG(16:0/17:0) | [M-H]-  |
| 150          |            | 736.4916 | PE(36:5) | 202               | PE(16:1/20:4) | [M-H]-  |
|              |            |          |          | 203               | PE(16:0/20:5) | [M-H]-  |
| 151          |            | 738.5078 | PE(36:4) | 204               | PE(18:1/18:3) | [M-H]-  |
|              |            |          |          | 205               | PE(16:0/20:4) | [M-H]-  |
| 152          |            | 740.5207 | PC(31:1) | 206               | PC(14:0/17:1) | [M+Na]+ |
|              |            |          |          | 207               | PC(15:0/16:1) | [M+Na]+ |
|              |            |          |          | 208               | PC(15:1/16:0) | [M+Na]+ |

| Unique peaks | Ion images | m/z      | Name       | Number identified | Name common     | adduct  |
|--------------|------------|----------|------------|-------------------|-----------------|---------|
| 153          |            | 740.5242 | PE(36:3)   | 209               | PE(16:0/20:3)   | [M-H]-  |
|              |            |          |            | 210               | PE(18:1/18:2)   | [M-H]-  |
| 154          |            | 742.5363 | PC(31:0)   | 211               | PC(15:0/16:0)   | [M+Na]+ |
| 155          |            | 742.5402 | PE(36:2)   | 212               | PE(18:0/18:2)   | [M-H]-  |
|              |            |          |            | 213               | PE(18:1/18:1)   | [M-H]-  |
| 156          |            | 743.4853 | PG(34:3)   | 214               | PG(16:0/18:3)_C | [M-H]-  |
|              |            |          |            | 215               | PG(16:0/18:3)_B | [M-H]-  |
|              |            |          |            | 216               | PG(16:1/18:2)_B | [M-H]-  |
|              |            |          |            | 217               | PG(16:1/18:2)_C | [M-H]-  |
|              |            |          |            | 218               | PG(16:1/18:2)_A | [M-H]-  |
|              |            |          |            | 219               | PG(16:0/18:3)_A | [M-H]-  |
| 157          |            | 744.5553 | PE(36:1)   | 220               | PE(14:0/22:1)   | [M-H]-  |
|              |            |          |            | 221               | PE(16:0/20:1)   | [M-H]-  |
|              |            |          |            | 222               | PE(18:0/18:1)   | [M-H]-  |
| 158          |            | 745.5018 | PG(34:2)   | 223               | PG(16:0/18:2)_A | [M-H]-  |
|              |            |          |            | 224               | PG(16:0/18:2)_B | [M-H]-  |
|              |            |          |            | 225               | PG(16:1/18:1)   | [M-H]-  |
| 159          |            | 746.5130 | PE(P-38:6) | 226               | PE(P-16:0/22:6) | [M-H]-  |
| 160          |            | 747.5168 | PG(34:1)   | 227               | PG(16:0/18:1)_A | [M-H]-  |
|              |            |          |            | 228               | PG(16:0/18:1)_B | [M-H]-  |
|              |            |          |            | 229               | PG(16:0/18:1)_C | [M-H]-  |
|              |            |          |            | 230               | PG(16:1/18:0)   | [M-H]-  |
|              |            |          |            |                   |                 | [M-H]-  |



| Unique peaks | Ion images                                                                          | m/z      | Name       | Number identified | Name common                                     | adduct                        |
|--------------|-------------------------------------------------------------------------------------|----------|------------|-------------------|-------------------------------------------------|-------------------------------|
| 161          | 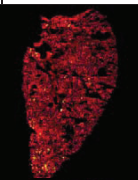   | 748.5161 | PS(33:0)   | 231               | PS(33:0)                                        | [M-H]-                        |
| 162          |    | 748.5284 | PE(P-38:5) | 232               | PE(P-38:5)                                      | [M-H]-                        |
| 163          |    | 749.5336 | PG(34:0)   | 233               | PG(16:0/18:0)                                   | [M-H]-                        |
| 164          |    | 750.5451 | PE(P-38:4) | 234<br>235        | PE(P-16:0/22:4)<br>PE(P-18:0/20:4)              | [M-H]-<br>[M-H]-              |
| 165          |   | 751.5251 | PA(40:4)   | 236               | PA(40:4)                                        | [M-H]-                        |
| 166          |  | 752.5207 | PC(32:2)   | 237<br>238<br>239 | PC(14:0/18:2)<br>PC(16:1/16:1)<br>PC(16:2/16:0) | [M+Na]+<br>[M+Na]+<br>[M+Na]+ |
|              |                                                                                     | 752.5230 | PC(34:5)   | 240<br>241        | PC(14:0/20:5)<br>PC(16:1/18:4)                  | [M+H]+<br>[M+H]+              |
| 167          |  | 752.5230 | PE(37:4)   | 242               | PE(17:0/20:4)                                   | [M-H]-                        |
| 168          |  | 753.5887 | SM(36:1)   | 243               | SM(d18:1/18:0)                                  | [M+Na]+                       |

| Unique peaks | Ion images                                                                            | m/z      | Name         | Number identified | Name common                                   | adduct             |
|--------------|---------------------------------------------------------------------------------------|----------|--------------|-------------------|-----------------------------------------------|--------------------|
| 169          | 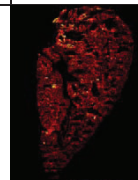   | 754.5363 | PC(32:1)     | 244<br>245        | PC(14:0/18:1)<br>PC(16:0/16:1)                | [M+Na]+<br>[M+Na]+ |
| 170          |    | 756.5520 | PC(32:0)     | 246               | PC(16:0/16:0)                                 | [M+Na]+            |
|              |                                                                                       | 756.5543 | PC(34:3)     | 247<br>248        | PC(16:0/18:3)<br>PC(16:1/18:2)                | [M+H]+<br>[M+H]+   |
| 171          |    | 758.6471 | HexCer(38:0) | 249               | HexCer(d18:0/20:0)                            | [M+H]+             |
| 172          |    | 760.4920 | PE(38:7)     | 250               | PE(16:1/22:6)                                 | [M-H]-             |
| 173          |   | 760.5121 | PS(34:1)     | 251<br>252        | PS(16:1/18:0)<br>PS(16:0/18:1)                | [M-H]-<br>[M-H]-   |
| 174          |  | 762.4911 | PR           | 253               | bacteriohopane-31,32,33,34-tetrol-35-cyclitol | [M+K]+             |
| 175          |  | 762.5092 | PE(38:6)     | 254               | PE(16:0/22:6)                                 | [M-H]-             |
| 176          |  | 764.5224 | PE(38:5)     | 255               | PE(18:1/20:4)                                 | [M-H]-             |

| Unique peaks | Ion images                                                                          | m/z      | Name       | Number identified               | Name common                                                                                 | adduct                                         |
|--------------|-------------------------------------------------------------------------------------|----------|------------|---------------------------------|---------------------------------------------------------------------------------------------|------------------------------------------------|
| 177          | 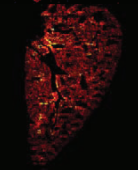   | 766.5363 | PC(33:2)   | 256<br>257                      | PC(15:0/18:2)<br>PC(15:1/18:1)                                                              | [M+Na]+<br>[M+Na]+                             |
| 178          |    | 766.5394 | PE(38:4)   | 258<br>259<br>260               | PE(16:0/22:4)<br>PE(18:0/20:4)<br>PE(18:1/20:3)                                             | [M-H]-<br>[M-H]-<br>[M-H]-                     |
| 179          |    | 767.4867 | PG(36:5)   | 261<br>262<br>263<br>264        | PG(16:0/20:5)_A<br>PG(16:0/20:5)_B<br>PG(16:0/20:5)_C<br>PG(18:2/18:3)                      | [M-H]-<br>[M-H]-<br>[M-H]-<br>[M-H]-           |
| 180          |    | 768.5553 | PE(38:3)   | 265                             | PE(18:0/20:3)                                                                               | [M-H]-                                         |
| 181          |   | 769.5015 | PG(36:4)   | 266<br>267<br>268<br>269<br>270 | PG(16:0/20:4)_C<br>PG(16:0/20:4)_B<br>PG(16:0/20:4)_A<br>PG(18:2/18:2)_A<br>PG(18:2/18:2)_B | [M-H]-<br>[M-H]-<br>[M-H]-<br>[M-H]-<br>[M-H]- |
| 182          |  | 770.5676 | PC(33:0)   | 271                             | PC(16:0/17:0)                                                                               | [M+Na]+                                        |
| 183          |  | 771.5161 | PG(36:3)   | 272<br>273<br>274               | PG(16:0/20:3)<br>PG(18:1/18:2)_B<br>PG(18:1/18:2)_A                                         | [M-H]-<br>[M-H]-<br>[M-H]-                     |
| 184          |  | 772.5285 | PE(P-40:7) | 275                             | PE(P-18:1/22:6)                                                                             | [M-H]-                                         |

| Unique peaks | Ion images                                                                            | m/z      | Name       | Number identified        | Name common                                                          | adduct                               |
|--------------|---------------------------------------------------------------------------------------|----------|------------|--------------------------|----------------------------------------------------------------------|--------------------------------------|
| 185          | 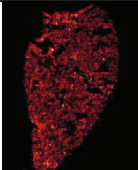   | 773.5325 | PG(36:2)   | 276<br>277<br>278<br>279 | PG(16:0/20:2)<br>PG(18:0/18:2)_B<br>PG(18:1/18:1)<br>PG(18:0/18:2)_A | [M-H]-<br>[M-H]-<br>[M-H]-<br>[M-H]- |
| 186          |    | 774.5439 | PE(P-40:6) | 280                      | PE(P-18:0/22:6)                                                      | [M-H]-                               |
| 187          |    | 775.5487 | PG(36:1)   | 281<br>282               | PG(18:0/18:1)_B<br>PG(18:0/18:1)_A                                   | [M-H]-<br>[M-H]-                     |
| 188          |    | 776.5207 | PC(34:4)   | 283                      | PC(14:0/20:4)                                                        | [M+Na]+                              |
| 189          |   | 776.5249 | PE(39:6)   | 284                      | PE(17:0/22:6)                                                        | [M-H]-                               |
| 190          |  | 776.5782 | PS(O-36:0) | 285                      | PS(O-36:0)                                                           | [M-H]-                               |
| 191          |  | 777.5364 | PS(34:1)   | 286                      | PS(34:1)                                                             | [M-H]-                               |
| 192          |  | 778.5387 | PC(36:6)   | 287<br>288<br>289        | PC(14:0/22:6)<br>PC(16:1/20:5)<br>PC(18:2/18:4)                      | [M+H]+<br>[M+H]+<br>[M+H]+           |



| Unique peaks | Ion images                                                                          | m/z      | Name       | Number identified | Name common                        | adduct           |
|--------------|-------------------------------------------------------------------------------------|----------|------------|-------------------|------------------------------------|------------------|
| 193          |    | 778.5752 | PE(P-40:4) | 290<br>291        | PE(P-20:0/20:4)<br>PE(P-18:0/22:4) | [M-H]-<br>[M-H]- |
| 194          |    | 780.5520 | PC(34:2)   | 292               | PC(16:0/18:2)                      | [M+Na]+          |
| 195          |    | 781.6200 | SM(38:1)   | 293               | SM(d18:1/20:0)                     | [M+Na]+          |
| 196          |    | 782.4967 | PS(36:4)   | 294               | PS(16:0/20:4)                      | [M-H]-           |
| 197          |   | 782.5676 | PC(34:1)   | 295               | PC(16:0/18:1)                      | [M+Na]+          |
| 198          |  | 783.4081 | MB         | 296               | Fumonisin FP2                      | [M-H]-           |
| 199          |  | 783.4571 | MB         | 297               | Hoduloside VI                      | [M-H]-           |
| 200          |  | 783.5182 | PG(37:4)   | 298               | PG(17:0/20:4)                      | [M-H]-           |

| Unique peaks | Ion images                                                                            | m/z      | Name     | Number identified        | Name common                                                              | adduct                               |
|--------------|---------------------------------------------------------------------------------------|----------|----------|--------------------------|--------------------------------------------------------------------------|--------------------------------------|
| 201          | 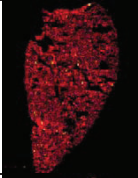   | 786.5067 | PE(40:8) | 299                      | PE(18:2/22:6)                                                            | [M-H]-                               |
| 202          |    | 786.5276 | PS(36:2) | 300<br>301<br>302<br>303 | PS(18:1/18:1)_B<br>PS(18:0/18:2)_B<br>PS(18:1/18:1)_A<br>PS(18:0/18:2)_A | [M-H]-<br>[M-H]-<br>[M-H]-<br>[M-H]- |
| 203          |    | 788.5237 | PE(40:7) | 304                      | PE(18:1/22:6)                                                            | [M-H]-                               |
| 204          |    | 788.5445 | PS(36:1) | 305                      | PS(18:0/18:1)                                                            | [M-H]-                               |
| 205          |   | 790.5363 | PC(35:4) | 306                      | PC(15:0/20:4)                                                            | [M+Na]+                              |
| 206          |  | 790.5390 | PE(40:6) | 307                      | PE(18:0/22:6)                                                            | [M-H]-                               |
| 207          |  | 791.4858 | PG(38:7) | 308<br>309<br>310<br>311 | PG(16:1/22:6)_A<br>PG(18:2/20:5)_A<br>PG(18:2/20:5)_B<br>PG(16:1/22:6)_B | [M-H]-<br>[M-H]-<br>[M-H]-<br>[M-H]- |
| 208          |  | 792.5526 | PE(40:5) | 312                      | PE(40:5)                                                                 | [M-H]-                               |

| Unique peaks | Ion images | m/z      | Name     | Number identified        | Name common                                                          | adduct                               |
|--------------|------------|----------|----------|--------------------------|----------------------------------------------------------------------|--------------------------------------|
| 209          |            | 793.5008 | PG(38:6) | 313<br>314<br>315<br>316 | PG(16:0/22:6)_B<br>PG(16:0/22:6)_A<br>PG(18:1/20:5)<br>PG(18:2/20:4) | [M-H]-<br>[M-H]-<br>[M-H]-<br>[M-H]- |
| 210          |            | 794.5676 | PC(35:2) | 317<br>318               | PC(17:0/18:2)<br>PC(17:1/18:1)                                       | [M+Na]+<br>[M+Na]+                   |
| 211          |            | 794.5704 | PE(40:4) | 319<br>320               | PE(18:0/22:4)<br>PE(20:0/20:4)                                       | [M-H]-<br>[M-H]-                     |
| 212          |            | 795.5190 | PG(38:5) | 321                      | PG(18:0/20:5)                                                        | [M-H]-                               |
| 213          |            | 796.5833 | PC(35:1) | 322                      | PC(17:0/18:1)                                                        | [M+Na]+                              |
| 214          |            | 797.5327 | PG(38:4) | 323<br>324<br>325        | PG(16:0/22:4)<br>PG(18:1/20:3)<br>PG(18:0/20:4)                      | [M-H]-<br>[M-H]-<br>[M-H]-           |
| 215          |            | 800.6185 | PE(40:1) | 326                      | PE(18:1/22:0)                                                        | [M-H]-                               |
| 216          |            | 801.5652 | PG(38:2) | 327                      | PG(18:0/20:2)                                                        | [M-H]-                               |

| Unique peaks | Ion images | m/z      | Name       | Number identified        | Name common                                                      | adduct                                   |
|--------------|------------|----------|------------|--------------------------|------------------------------------------------------------------|------------------------------------------|
| 217          |            | 802.5363 | PC(36:5)   | 328<br>329<br>330<br>331 | PC(14:0/22:5)<br>PC(16:0/20:5)<br>PC(16:1/20:4)<br>PC(18:2/18:3) | [M+Na]+<br>[M+Na]+<br>[M+Na]+<br>[M+Na]+ |
| 218          |            | 802.5742 | PE(P-42:6) | 332                      | PE(P-20:0/22:6)                                                  | [M-H]-                                   |
| 219          |            | 804.5520 | PC(36:4)   | 333<br>334<br>335        | PC(14:0/22:4)<br>PC(16:0/20:4)<br>PC(18:2/18:2)                  | [M+Na]+<br>[M+Na]+<br>[M+Na]+            |
| 220          |            | 806.4980 | PS(38:6)   | 336<br>337               | PS(16:0/22:6)<br>PS(18:2/20:4)                                   | [M-H]-<br>[M-H]-                         |
| 221          |            | 807.5019 | PI(32:1)   | 338                      | PI(16:0/16:1)                                                    | [M-H]-                                   |
| 222          |            | 807.5159 | PG(39:6)   | 339                      | PG(17:0/22:6)                                                    | [M-H]-                                   |
| 223          |            | 807.6357 | SM(40:2)   | 340<br>341               | SM(d18:1/22:1)<br>SM(d18:2/22:0)                                 | [M+Na]+<br>[M+Na]+                       |
| 224          |            | 808.5139 | PS(38:5)   | 342<br>343               | PS(18:1/20:4)<br>PS(18:0/20:5)                                   | [M-H]-<br>[M-H]-                         |

| Unique peaks | Ion images                                                                          | m/z      | Name     | Number identified | Name common                    | adduct                                   |
|--------------|-------------------------------------------------------------------------------------|----------|----------|-------------------|--------------------------------|------------------------------------------|
| 225          | 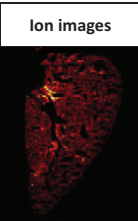    | 808.5833 | PC(36:2) | 344               | PC(18:0/18:2)                  | [M+Na] <sup>+</sup>                      |
| 226          |    | 808.5859 | PE(41:4) | 345               | PE(19:0/22:4)                  | [M-H] <sup>-</sup>                       |
| 227          |    | 809.6513 | SM(40:1) | 346               | SM(d18:1/22:0)                 | [M+Na] <sup>+</sup>                      |
| 228          |    | 810.5291 | PS(38:4) | 347               | PS(18:0/20:4)                  | [M-H] <sup>-</sup>                       |
| 229          |   | 812.5430 | PS(38:3) | 348               | PS(18:0/20:3)                  | [M-H] <sup>-</sup>                       |
| 230          |  | 814.5363 | PC(37:6) | 349               | PC(15:0/22:6)                  | [M+Na] <sup>+</sup>                      |
| 231          |  | 814.5379 | PE(42:8) | 350               | PE(20:2/22:6)                  | [M-H] <sup>-</sup>                       |
| 232          |  | 815.4875 | PG(40:9) | 351<br>352        | PG(18:3/22:6)<br>PG(20:4/20:5) | [M-H] <sup>-</sup><br>[M-H] <sup>-</sup> |

| Unique peaks | Ion images                                                                            | m/z      | Name     | Number identified        | Name common                                                              | adduct                                                                               |
|--------------|---------------------------------------------------------------------------------------|----------|----------|--------------------------|--------------------------------------------------------------------------|--------------------------------------------------------------------------------------|
| 233          | 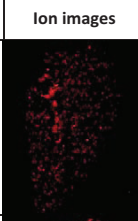    | 816.5535 | PE(42:7) | 353                      | PE(20:1/22:6)                                                            | [M-H] <sup>-</sup>                                                                   |
| 234          |    | 817.5022 | PG(40:8) | 354<br>355<br>356<br>357 | PG(18:2/22:6)_A<br>PG(18:2/22:6)_B<br>PG(18:2/22:6)_C<br>PG(18:2/22:6)_D | [M-H] <sup>-</sup><br>[M-H] <sup>-</sup><br>[M-H] <sup>-</sup><br>[M-H] <sup>-</sup> |
| 235          |    | 818.5700 | PC(39:7) | 358                      | PC(17:1/22:6)                                                            | [M+H] <sup>+</sup>                                                                   |
| 236          |    | 819.5167 | PG(40:7) | 359<br>360<br>361        | PG(18:1/22:6)_C<br>PG(18:1/22:6)_B<br>PG(18:1/22:6)_A                    | [M-H] <sup>-</sup><br>[M-H] <sup>-</sup><br>[M-H] <sup>-</sup>                       |
| 237          |   | 820.5133 | PS(39:6) | 362                      | PS(17:0/22:6)                                                            | [M-H] <sup>-</sup>                                                                   |
| 238          |  | 820.5849 | PE(42:5) | 363                      | PE(20:4/22:1)                                                            | [M-H] <sup>-</sup>                                                                   |
| 239          |  | 820.5856 | PC(39:6) | 364                      | PC(17:0/22:6)                                                            | [M+H] <sup>+</sup>                                                                   |
| 240          |  | 821.5319 | PG(40:6) | 365<br>366               | PG(18:0/22:6)_A<br>PG(18:0/22:6)_B                                       | [M-H] <sup>-</sup><br>[M-H] <sup>-</sup>                                             |

| Unique peaks | Ion images                                                                          | m/z      | Name     | Number identified        | Name common                                                      | adduct                                                                                   |
|--------------|-------------------------------------------------------------------------------------|----------|----------|--------------------------|------------------------------------------------------------------|------------------------------------------------------------------------------------------|
| 241          |    | 822.6006 | PE(42:4) | 367                      | PE(20:4/22:0)                                                    |                                                                                          |
| 242          |    | 826.5363 | PC(38:7) | 368<br>369<br>370        | PC(16:1/22:6)<br>PC(18:2/20:5)<br>PC(18:3/20:4)                  | [M+Na] <sup>+</sup><br>[M+Na] <sup>+</sup><br>[M+Na] <sup>+</sup>                        |
| 243          |    | 828.5520 | PC(38:6) | 371<br>372<br>373<br>374 | PC(16:0/22:6)<br>PC(16:1/22:5)<br>PC(18:1/20:5)<br>PC(18:2/20:4) | [M+Na] <sup>+</sup><br>[M+Na] <sup>+</sup><br>[M+Na] <sup>+</sup><br>[M+Na] <sup>+</sup> |
|              |                                                                                     | 828.5543 | PC(40:9) | 375<br>376               | PC(18:3/22:6)<br>PC(20:4/20:5)                                   | [M+H] <sup>+</sup><br>[M+H] <sup>+</sup>                                                 |
| 244          |    | 830.5676 | PC(38:5) | 377<br>378<br>379        | PC(16:0/22:5)<br>PC(18:0/20:5)<br>PC(18:1/20:4)                  | [M+Na] <sup>+</sup><br>[M+Na] <sup>+</sup><br>[M+Na] <sup>+</sup>                        |
| 245          |   | 832.5134 | PS(40:7) | 380                      | PS(18:1/22:6)                                                    | [M-H] <sup>-</sup>                                                                       |
| 246          |  | 832.5833 | PC(38:4) | 381<br>382<br>383        | PC(16:0/22:4)<br>PC(18:0/20:4)<br>PC(18:1/20:3)                  | [M+Na] <sup>+</sup><br>[M+Na] <sup>+</sup><br>[M+Na] <sup>+</sup>                        |
| 247          |  | 833.5172 | PI(34:2) | 384<br>385               | PI(16:0/18:2)<br>PI(16:1/18:1)                                   | [M-H] <sup>-</sup><br>[M-H] <sup>-</sup>                                                 |
| 248          |  | 833.6513 | SM(42:3) | 386                      | SM(d18:2/24:1)                                                   | [M+Na] <sup>+</sup>                                                                      |

| Unique peaks | Ion images                                                                            | m/z      | Name      | Number identified | Name common                                     | adduct                                                         |
|--------------|---------------------------------------------------------------------------------------|----------|-----------|-------------------|-------------------------------------------------|----------------------------------------------------------------|
| 249          | 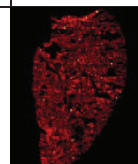   | 834.5294 | PS(40:6)  | 387               | PS(18:0/22:6)                                   | [M-H] <sup>-</sup>                                             |
| 250          |    | 835.5321 | PI(34:1)  | 388               | PI(16:0/18:1)                                   | [M-H] <sup>-</sup>                                             |
| 251          |    | 835.6670 | SM(42:2)  | 389               | SM(d18:1/24:1)                                  | [M+Na] <sup>+</sup>                                            |
| 252          |    | 836.5430 | PS(40:5)  | 390               | PS(40:5)                                        | [M-H] <sup>-</sup>                                             |
| 253          |   | 836.6169 | PC(40:5)  | 391<br>392<br>393 | PC(18:0/22:5)<br>PC(20:0/20:5)<br>PC(20:1/20:4) | [M+H] <sup>+</sup><br>[M+H] <sup>+</sup><br>[M+H] <sup>+</sup> |
| 254          |  | 838.5612 | PS(40:4)  | 394               | PS(18:0/22:4)                                   | [M-H] <sup>-</sup>                                             |
| 255          |  | 839.4879 | PG(42:11) | 395               | PG(20:5/22:6)                                   | [M-H] <sup>-</sup>                                             |
| 256          |  | 841.5012 | PG(42:10) | 396               | PG(20:4/22:6)                                   | [M-H] <sup>-</sup>                                             |

| Unique peaks | Ion images         | m/z      | Name      | Number identified | Name common        | adduct  |                    |        |
|--------------|--------------------|----------|-----------|-------------------|--------------------|---------|--------------------|--------|
| 257          |                    | 843.5178 | PG(42:9)  | 397               | PG(20:3/22:6)_A    | [M-H]-  |                    |        |
|              |                    |          |           | 398               | PG(20:3/22:6)_B    | [M-H]-  |                    |        |
| 258          |                    | 845.5331 | PG(42:8)  | 399               | PG(20:4/22:4)      | [M-H]-  |                    |        |
|              |                    |          |           | 400               | PG(20:2/22:6)      | [M-H]-  |                    |        |
| 259          |                    | 852.5520 | PC(40:8)  | 401               | PC(18:2/22:6)      | [M+Na]+ |                    |        |
|              |                    |          |           | 402               | PC(20:4/20:4)      | [M+Na]+ |                    |        |
| 260          |                    | 853.7262 | TG(50:2)  | 403               | TG(16:0/16:0/18:2) | [M+Na]+ |                    |        |
|              |                    |          |           | 404               | TG(16:0/16:1/18:1) | [M+Na]+ |                    |        |
|              |                    | 853.7286 | TG(52:5)  | 405               | TG(14:0/16:0/22:5) | [M+H]+  |                    |        |
|              |                    |          |           | 406               | TG(14:0/18:1/20:4) | [M+H]+  |                    |        |
|              |                    |          |           | 407               | TG(16:0/16:0/20:5) | [M+H]+  |                    |        |
| 408          | TG(16:0/16:1/20:4) |          |           | [M+H]+            |                    |         |                    |        |
| 261          |                    | 854.5676 | PC(40:7)  | 409               | PC(18:1/22:6)      | [M+Na]+ |                    |        |
|              |                    |          |           | 410               | PC(18:2/22:5)      | [M+Na]+ |                    |        |
|              |                    |          |           | 411               | PC(20:3/20:4)      | [M+Na]+ |                    |        |
|              |                    | 854.5700 | PC(42:10) | 412               | PC(20:4/22:6)      | [M+H]+  |                    |        |
|              |                    |          |           | 413               | PC(20:5/22:5)      | [M+H]+  |                    |        |
| 262          |                    | 855.5017 | PI(36:5)  | 414               | PI(16:0/20:5)      | [M-H]-  |                    |        |
|              |                    |          |           | 415               | PI(16:1/20:4)      | [M-H]-  |                    |        |
| 263          |                    | 855.7419 | TG(50:1)  | 416               | TG(16:0/16:0/18:1) | [M+Na]+ |                    |        |
|              |                    |          |           | 855.7442          | TG(52:4)           | 417     | TG(16:0/18:2/18:2) | [M+H]+ |
|              |                    |          |           |                   |                    | 418     | TG(16:1/18:1/18:2) | [M+H]+ |
| 264          |                    | 856.5144 | PS(42:9)  | 419               | PS(20:3/22:6)      | [M-H]-  |                    |        |

| Unique peaks | Ion images | m/z      | Name      | Number identified | Name common     | adduct  |
|--------------|------------|----------|-----------|-------------------|-----------------|---------|
| 265          |            | 856.5833 | PC(40:6)  | 420               | PC(18:0/22:6)   | [M+Na]+ |
|              |            |          |           | 421               | PC(18:1/22:5)   | [M+Na]+ |
|              |            |          |           | 422               | PC(18:2/22:4)   | [M+Na]+ |
|              |            |          |           | 423               | PC(20:2/20:4)   | [M+Na]+ |
|              |            | 856.5856 | PC(42:9)  | 424               | PC(20:3/22:6)   | [M+H]+  |
| 266          |            | 857.5189 | PI(36:4)  | 425               | PI(16:0/20:4)   | [M-H]-  |
|              |            |          |           | 426               | PI(18:2/18:2)   | [M-H]-  |
| 267          |            | 858.6013 | PC(42:8)  | 427               | PC(20:2/22:6)   | [M+H]+  |
|              |            |          |           | 428               | PC(20:4/22:4)   | [M+H]+  |
| 268          |            | 859.5348 | PI(36:3)  | 429               | PI(16:0/20:3)_A | [M-H]-  |
|              |            |          |           | 430               | PI(16:0/20:3)_B | [M-H]-  |
|              |            |          |           | 431               | PI(18:1/18:2)   | [M-H]-  |
| 269          |            | 860.6169 | PC(42:7)  | 432               | PC(20:1/22:6)   | [M+H]+  |
| 270          |            | 861.5479 | PI(36:2)  | 433               | PI(18:0/18:2)   | [M-H]-  |
| 271          |            | 863.5630 | PI(36:1)  | 434               | PI(18:0/18:1)   | [M-H]-  |
| 272          |            | 865.5033 | PG(44:12) | 435               | PG(22:6/22:6)_B | [M-H]-  |
|              |            |          |           | 436               | PG(22:6/22:6)_A | [M-H]-  |

| Unique peaks | Ion images | m/z      | Name      | Number identified | Name common        | adduct             |         |
|--------------|------------|----------|-----------|-------------------|--------------------|--------------------|---------|
| 273          |            | 869.5342 | PG(44:10) | 437               | PG(22:4/22:6)      | [M-H]-             |         |
| 274          |            | 874.5363 | PC(42:11) | 438               | PC(20:5/22:6)      | [M+Na]+            |         |
| 275          |            | 879.7419 | TG(52:3)  | 439               | TG(16:0/16:0/20:3) | [M+Na]+            |         |
|              |            | 879.7442 | TG(54:6)  | 440               | TG(16:0/18:1/18:2) | [M+Na]+            |         |
| 276          |            |          | 881.5176  | PI(38:6)          | 441                | TG(16:0/16:0/22:6) | [M+H]+  |
|              |            |          |           |                   | 442                | TG(18:2/18:2/18:2) | [M+H]+  |
|              |            |          |           |                   | 443                | PI(18:2/20:4)      | [M-H]-  |
| 277          |            |          | 881.7575  | TG(52:2)          | 444                | PI(18:1/20:5)      | [M-H]-  |
|              |            |          |           |                   | 445                | PI(16:0/22:6)      | [M-H]-  |
|              |            |          |           |                   | 446                | TG(16:0/18:0/18:2) | [M+Na]+ |
| 278          |            | 883.5338 | PI(38:5)  | 447               | TG(16:0/18:1/18:1) | [M+Na]+            |         |
|              |            |          |           | 448               | TG(18:1/18:2/18:2) | [M+H]+             |         |
| 279          |            | 885.5471 | PI(38:4)  | 449               | PI(18:1/20:4)      | [M-H]-             |         |
|              |            |          |           | 450               | PI(18:0/20:5)      | [M-H]-             |         |
| 280          |            | 887.5640 | PI(38:3)  | 451               | PI(16:0/22:4)      | [M-H]-             |         |
|              |            |          |           | 452               | PI(18:0/20:4)_A    | [M-H]-             |         |
|              |            |          |           | 453               | PI(18:0/20:4)_B    | [M-H]-             |         |
|              |            |          |           | 454               | PI(18:1/20:3)      | [M-H]-             |         |
| 280          |            |          |           | 455               | PI(18:0/20:3)      | [M-H]-             |         |

| Unique peaks | Ion images | m/z      | Name     | Number identified | Name common   | adduct          |        |
|--------------|------------|----------|----------|-------------------|---------------|-----------------|--------|
| 281          |            | 907.5338 | PI(40:7) | 456               | PI(20:3/20:4) | [M-H]-          |        |
|              |            |          |          | 457               | PI(18:1/22:6) | [M-H]-          |        |
| 282          |            |          | 909.5466 | PI(40:6)          | 458           | PI(20:2/20:4)_A | [M-H]- |
|              |            |          |          |                   | 459           | PI(20:2/20:4)_B | [M-H]- |
|              |            |          |          |                   | 460           | PI(18:0/22:6)   | [M-H]- |
| 283          |            |          | 911.5635 | PI(40:5)          | 461           | PI(40:5)        | [M-H]- |
| 284          |            |          | 913.5802 | PI(40:4)          | 462           | PI(18:0/22:4)   | [M-H]- |
